# Supplementary material for: Lifewide profile of cytokine production by innate and adaptive immune cells from Brazilian individuals
Source: PubMed Central journal article supplement (PMC5260119; doi:10.1186/s12979-017-0084-5), 2017-01-23

Establishment of Age Ranges Based on the Immunological Rhythm of Innate Immunity

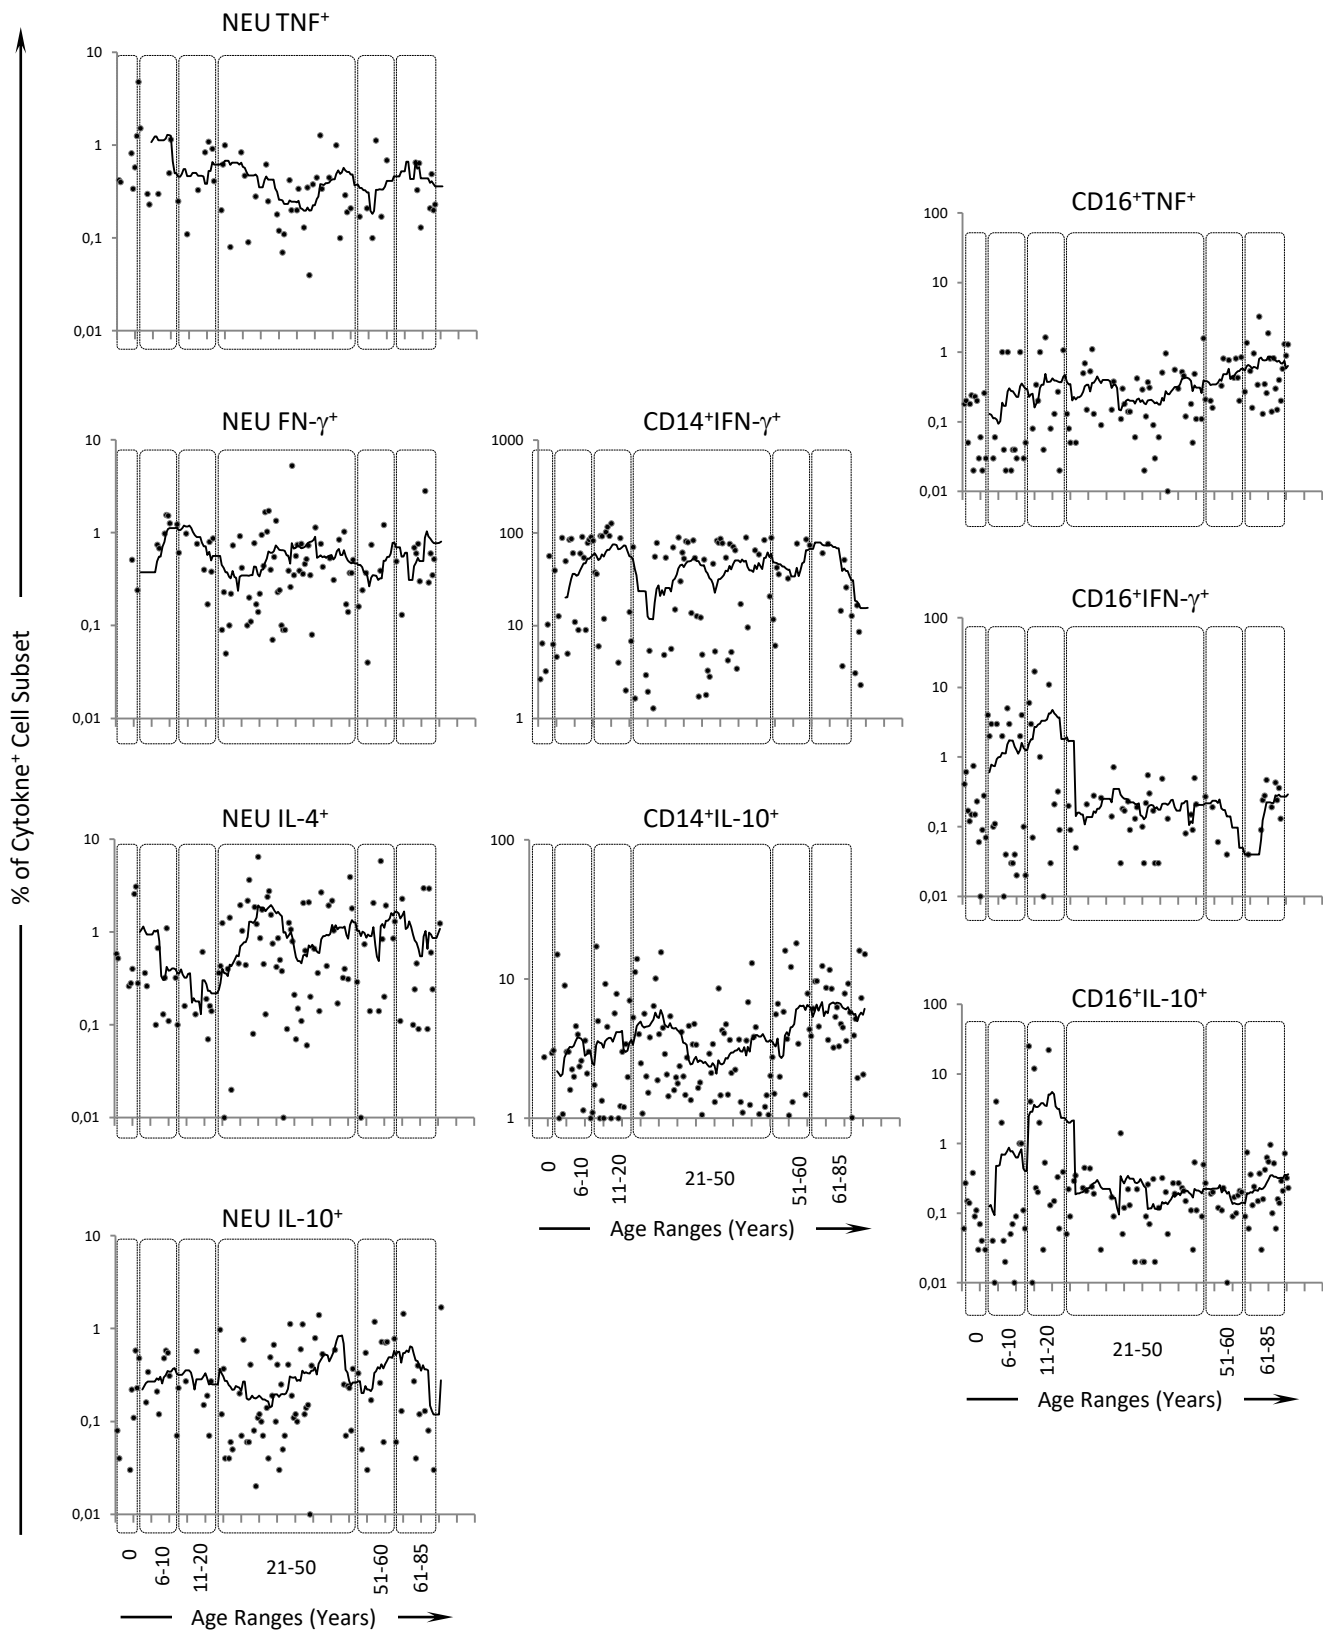

Supplement: 12979_2017_84_MOESM1_ESM.pdf [file 12979_2017_84_MOESM1_ESM.pdf]
